# Supplementary material for: ISL1 and BRN3B co-regulate the differentiation of murine retinal ganglion cells
Source: Oxford University Press journal article supplement (doi:10.1242/dev.010751), 2008-04-24
Supplement: dev010751-tables1.pdf [file dev010751-tables1.pdf]

**Table S1. ISL1 and BRN3B regulate the expression of *Gap43* and *L1cam* in the retina**

| Gene         | <i>Isl1</i> null    |                    |                 | <i>Brn3b</i> null   |                    |                 |
|--------------|---------------------|--------------------|-----------------|---------------------|--------------------|-----------------|
|              | Relative expression | Standard deviation | t-test          | Relative expression | Standard deviation | t-test          |
| <i>Gap43</i> | 0.578               | 0.029              | <i>P</i> <0.001 | 0.482               | 0.010              | <i>P</i> <0.001 |
| <i>L1cam</i> | 0.690               | 0.017              | <i>P</i> <0.01  | 0.727               | 0.082              | <i>P</i> <0.05  |

Real time PCR is performed with E14.5 retinas from *Isl1* nulls, *Brn3b* nulls and the controls. Relative expression of genes is calculated using the formula:  $2^{\Delta MT - \Delta WT}$ .  $\Delta MT$  is the difference of cutoff cycles between the gene of interest and the control gene ( $\beta$ -actin) for mutants and  $\Delta WT$  is that for controls. The numbers listed in the table are the average from three independent experiments.
